# Supplementary material for: Metal–organic framework biosensor with high stability and selectivity in a bio-mimic environment
Source: Royal Society of Chemistry journal article supplement (doi:10.1039/c5cc02113h), 2015-01-01
Supplement: c5cc02113h1.pdf [file c5cc02113h1.pdf]

## Supplementary Information

### Metal-Organic Framework Biosensor with High Stability and Selectivity in the Bio-mimic Environment

Xiao-Qin Wu, Jian-Gong Ma,\* Han Li, Di-Ming Chen, Wen Gu, Guang-Ming Yang, and Peng Cheng\*

#### 1. Experimental Part

##### 1.1 Chemicals and Instrumentation

Copper(II) chloride dehydrate ( $\text{CuCl}_2 \cdot 2\text{H}_2\text{O}$ , 99%), 2,5-dicarboxylic acid-3,4-ethylene dioxythiophene ( $\text{H}_2\text{L}$ , >95%), N,N-dimethylacetamide (DMA, >99%), L(+)-ascorbic acid (AA, >99%) and all the amino acids were purchased from commercial suppliers (Aladdin-reagent and TCL-reagent) and were used as received without further purification. All solutions were prepared with ultrapure water.

The phases were analyzed by X-ray powder diffraction (XRD) using a D/Max-2500 X-ray diffractometer with Cu  $K\alpha$  radiation. The FT-IR spectra were measured with a Bruker Tensor 27 spectrophotometer on KBr disks. TGA experiment were performed on a NETZSCH TG 209 instrument with a heating rate of  $10\text{ }^\circ\text{C min}^{-1}$ . The morphologies were examined by a high-resolution TEM (FEI, Tecnai G2F20, USA) microscopes.

##### 1.2 Synthesis of $\{[\text{Cu}_2(\text{H}_2\text{L})_2(\mu_2\text{-O})_2(\text{H}_2\text{O})_5] \cdot \text{H}_2\text{O}\}_n$ (**1**)

A mixture of 34.10 mg (0.2 mmol)  $\text{CuCl}_2 \cdot 2\text{H}_2\text{O}$  and 46.04 mg (0.2 mmol)  $\text{H}_2\text{L}$  was dissolved in a mixture of 5 mL DMA and 10 mL  $\text{H}_2\text{O}$ , and then heated for 2 days at  $90\text{ }^\circ\text{C}$  in a Parr Teflon-lined stainless steel vessel (23 mL), then cooled to room temperature slowly in 2 days. Green diamond-like crystals of **1** were collected at the bottom of the glass vessel. Yield: 50.2 mg (69.1 %). Anal. Calc for  $\text{C}_{16}\text{H}_{22}\text{Cu}_2\text{O}_{20}\text{S}_2$ : C, 26.42; H, 3.32 Found: C, 27.42; H, 4.00 (%); IR (KBr disk/ $\text{cm}^{-1}$ ) 3323.66 m, 2961.15 m, 1603.28 s, 1451.22 m, 1387.15 s, 1350.26 s, 1200.57 w, 1100.17 s, 848.01 w, 793.57 w, 734.69 w, 538.48 w.

##### 1.3 Electrochemical Section

Cyclic Voltammetry (CV) Analysis: An Epsilon electrochemical workstation (made in USA) was used for CV studies. Three-electrode system was used as follow: the working electrode was **1**-GCE; the auxiliary electrode was a platinum wire, and the reference electrode was an Ag/AgCl (sat. KCl) electrode. All studies were carried out at room temperature and under nitrogen surroundings. For the pH measurements a pH meter with a combined glass electrode was used.

Ultra-pure water (ulup, 18.2 M $\Omega$  cm, 25 °C) was used to prepare all electrolyte solutions. For electrochemical measurements a K<sub>2</sub>HPO<sub>4</sub>/KH<sub>2</sub>PO<sub>4</sub> buffer solution (pH = 6.8) was used, which was prepared by mixing suitable volumes of 0.2 mol·cm<sup>-3</sup> K<sub>2</sub>HPO<sub>4</sub> solution and 0.2 mol·cm<sup>-3</sup> KH<sub>2</sub>PO<sub>4</sub> solution.

Prior to be used, the glass carbon electrode (GCE) was carefully polished with an alumina slurry (0.5  $\mu$ m particle size) until a mirror-like surface was obtained, then rinsed ultrasonically with ultrapure water, nitric acid (1:1, v/v), sodium hydroxide (0.1 mol·cm<sup>-3</sup>) and ethanol, respectively, to remove any alumina residue from the electrode surface. The ultrasonic process was handled with an ultrasonic cleaning machine (Elma, S100H).

Electrode modification was performed as follow: depositing 0.020 g **1** dissolved in the gelatin (0.5 g, 10 mL H<sub>2</sub>O), and 10  $\mu$ L of this solution were putting on the GCE surface. Then a clean beaker was coated on the modified electrode, which was dried in the air for 12 h.

Impedance Analysis: Electrochemical Impedance Spectroscopy (EIS) was performed using a Zahner-Zennium electrochemical workstation (made in Germany). All samples were collected using a three-electrode system (the working electrode was **1-GCE**; the auxiliary electrode was a platinum wire and the reference electrode was an Ag/AgCl (sat. KCl) electrode) in 10 mL 0.1 M KCl solution containing 5 mM potassium ferricyanide, which acted as an electrolyte (EIS frequency was cycled between 0.1 Hz – 100 kHz).

## 2. Characterization

### 2.1 X-ray crystallography

Diffraction intensity data for single crystals of **1** was collected on a Agilent Technologies SuperNova Single Crystal Diffractometer at 293 (2) K equipped with graphite-monochromatic Mo K $\alpha$  radiation ( $\lambda = 0.71073$  Å). The structures were solved by SHELXS (direct methods) and refined by SHELXL (full matrix least-squares techniques)<sup>1</sup> in the Olex2 package.<sup>2</sup>

Table S1. Crystal data and structure refinements for **1**

|                                                  |                                                                                  |
|--------------------------------------------------|----------------------------------------------------------------------------------|
| formula                                          | C <sub>16</sub> H <sub>24</sub> Cu <sub>2</sub> O <sub>19.5</sub> S <sub>2</sub> |
| M, g mol <sup>-1</sup>                           | 719.5741                                                                         |
| cryst syst                                       | Triclinic system                                                                 |
| space group                                      | <i>P</i> -1                                                                      |
| <i>a</i> / Å                                     | 7.6226(6)                                                                        |
| <i>b</i> / Å                                     | 8.0332(7)                                                                        |
| <i>c</i> / Å                                     | 19.2709(16)                                                                      |
| $\alpha$ / deg                                   | 89.772(7)                                                                        |
| $\beta$ / deg                                    | 88.902(7)                                                                        |
| $\gamma$ / deg                                   | 76.322(7)                                                                        |
| <i>V</i> / Å <sup>3</sup>                        | 1146.35(17)                                                                      |
| <i>Z</i>                                         | 2                                                                                |
| reflns collected                                 | 7937                                                                             |
| unique reflns                                    | 4037                                                                             |
| <i>R</i> 1 [ <i>I</i> > 2 $\sigma$ ( <i>I</i> )] | 0.0684                                                                           |
| <i>wR</i> 2(all data)                            | 0.1947                                                                           |

One of the Cu centers is disordered to two positions (Cu1, Cu1') in **1**. The selected crystal parameters, data collection, and refinements are summarized in Table S1.

1. G. M. Sheldrick, *Acta Cryst.*, 2008, **A64**, 112-122
2. O. V. Dolomanov, L. J. Bourhis, R. J. Gildea, J. A. K. Howard and H. Puschmann, *J. Appl. Cryst.*, 2009, **42**, 339-341.

## 2.2 N<sub>2</sub> sorption isotherm of 1

The evaluated Brunauer-Emmett-Teller ( $S_{\text{BET}}$ ) and Langmuir surface areas ( $S_{\text{Langmuir}}$ ) from the N<sub>2</sub> adsorption isotherms are 88.1 and 116.8 m<sup>2</sup>/g for 1, respectively.

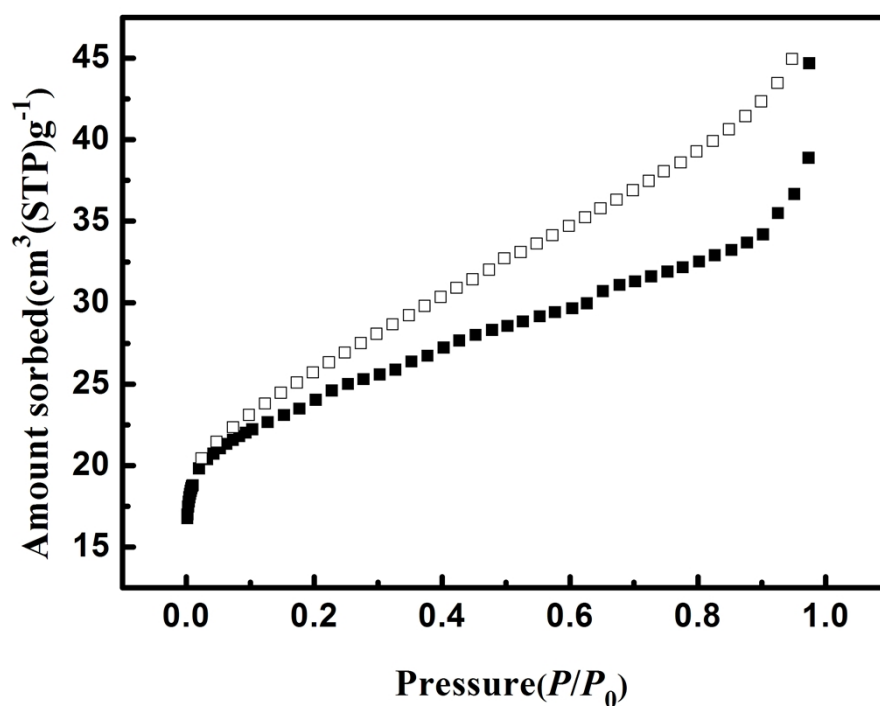

Fig. S1. N<sub>2</sub> sorption isotherm of 1 at 77 K (filled and open symbols represent adsorption and desorption data, respectively).

## 2.3 Thermal Gravimetric Analyses.

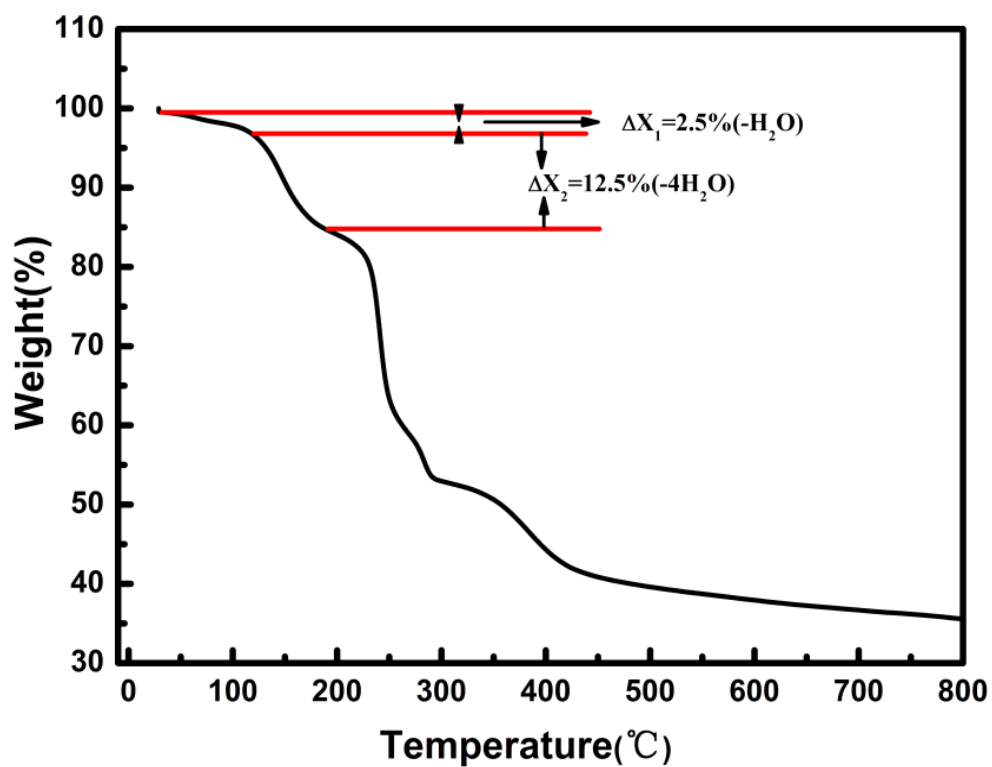

Fig. S2. Thermal gravimetric analyses (TGA) of 1

## 2.4 Powder X-ray Diffraction patterns.

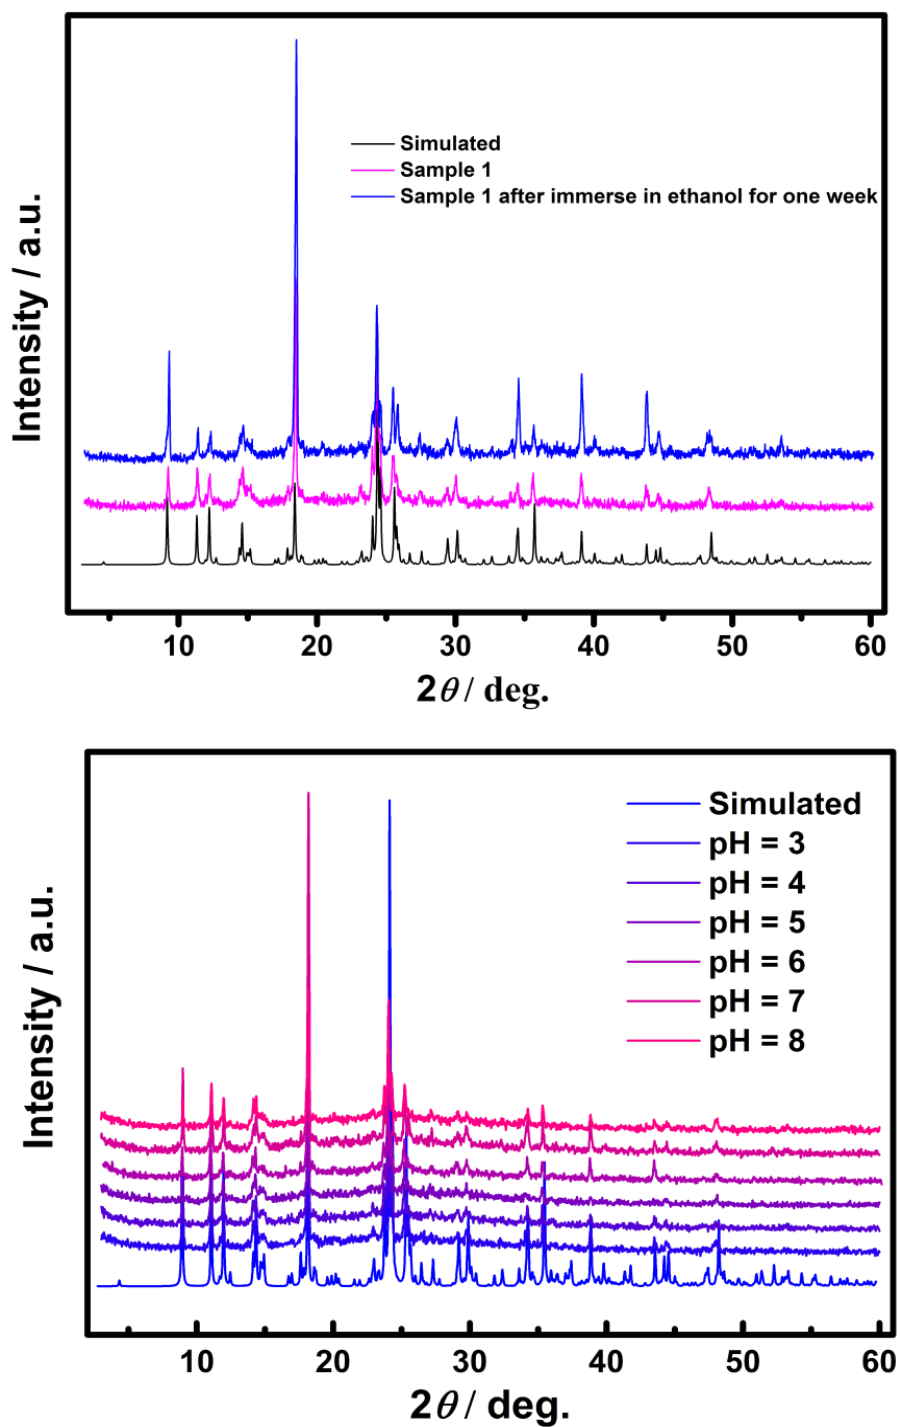

**Fig. S3.** Top: PXRD patterns of the simulated one of **1**, sample **1** and sample **1** after immersed in ethanol for one week. Bottom: PXRD patterns of **1** in different pH aqueous solution and the simulated one from single-crystal data.

### 3. Electrochemical Characterization

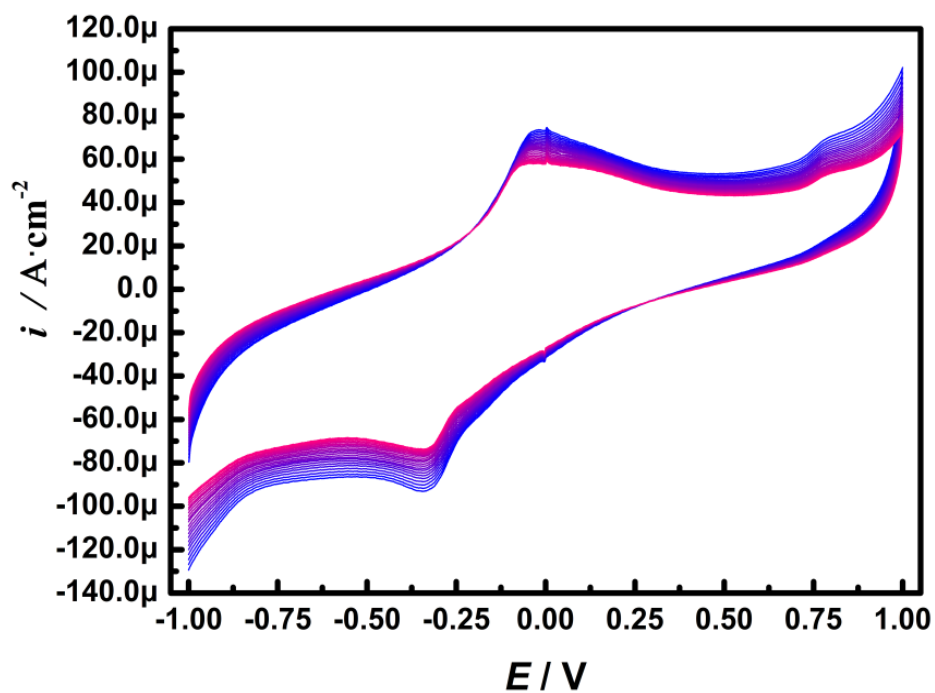

Fig. S4. Cyclic voltammetry in phosphate buffer solution (pH 6.8) at 1-GCE for 20 circles.

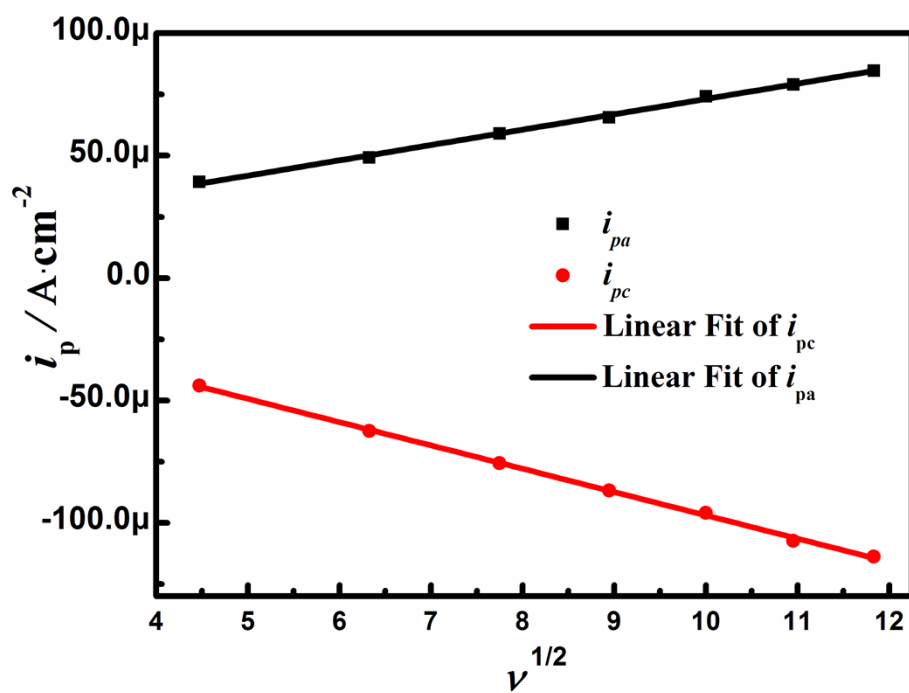

Fig. S5. Plots of  $i_{pa}$  and  $i_{pc}$  vs square root of scan rate  $v^{1/2}$ , respectively, for Fig. 2b.

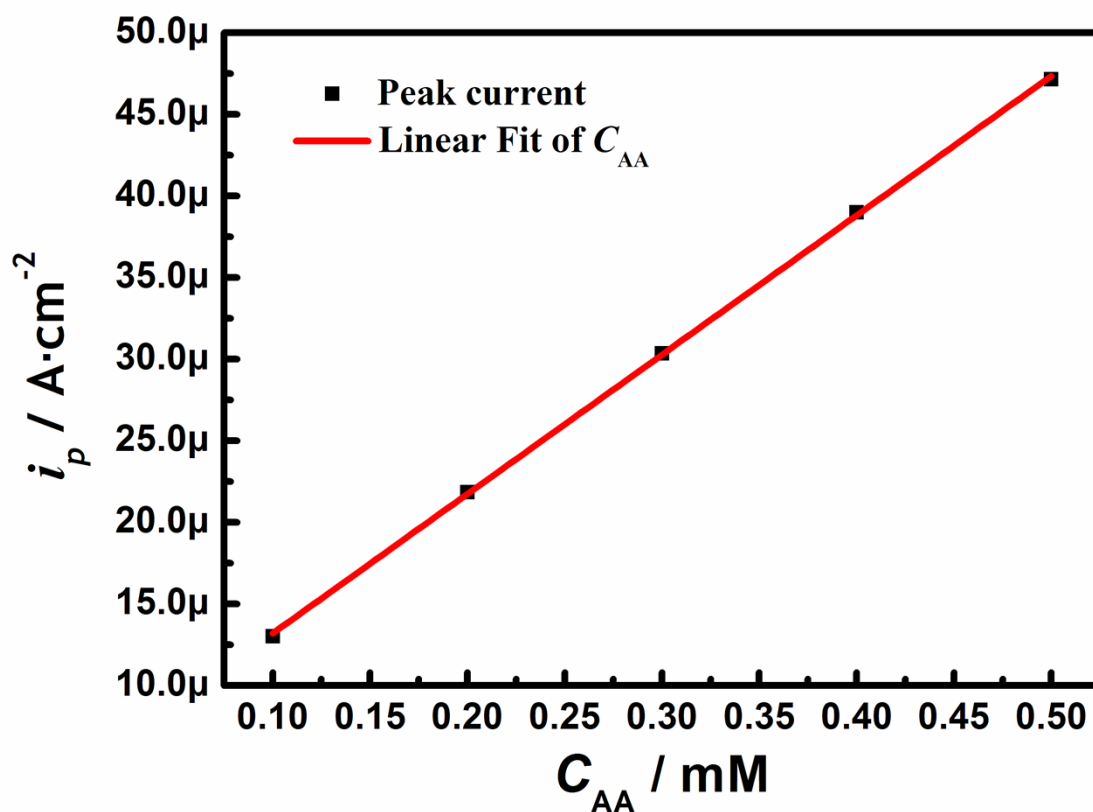

Fig. S6. Plots of  $i_{pa}$  vs AA concentration ( $C_{AA}$ ) for Fig. 4a.

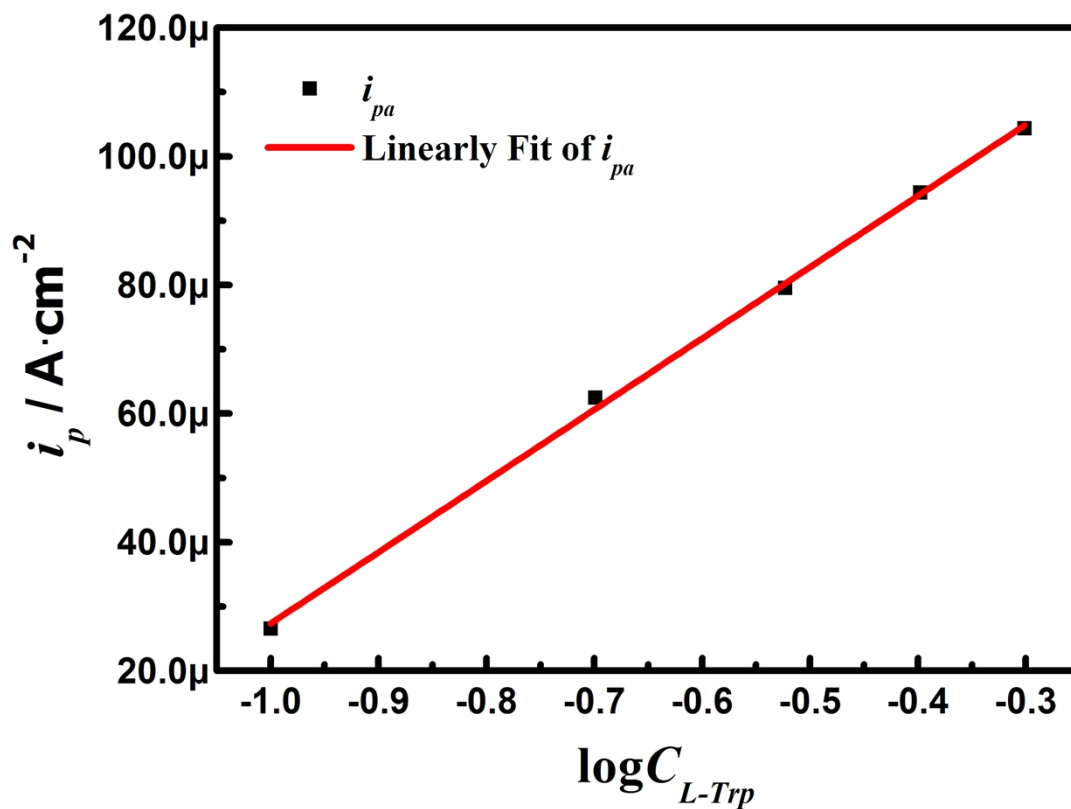

Fig. S7. Plots of  $i_{pa}$  vs L-Trp concentration for Fig. 4b.

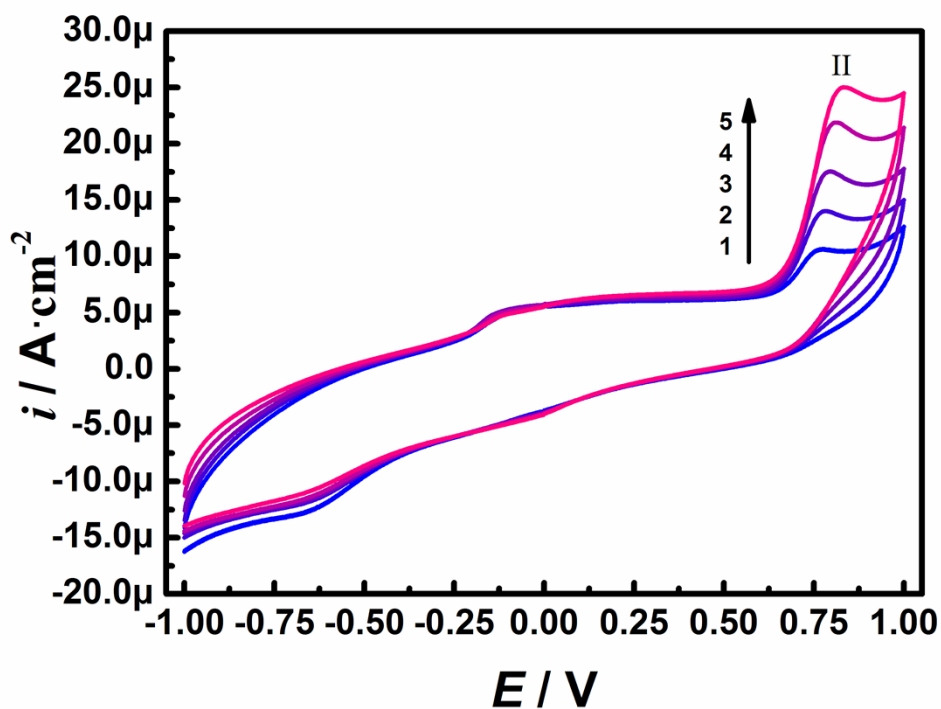

Fig. S8. Cyclic Voltammograms of 1-GCE in pH 6.8 buffer solution with the concentration of L-Trp: 0.1, 0.2, 0.3, 0.4 and 0.5 mM, respectively (scan rate 100 mv/s).

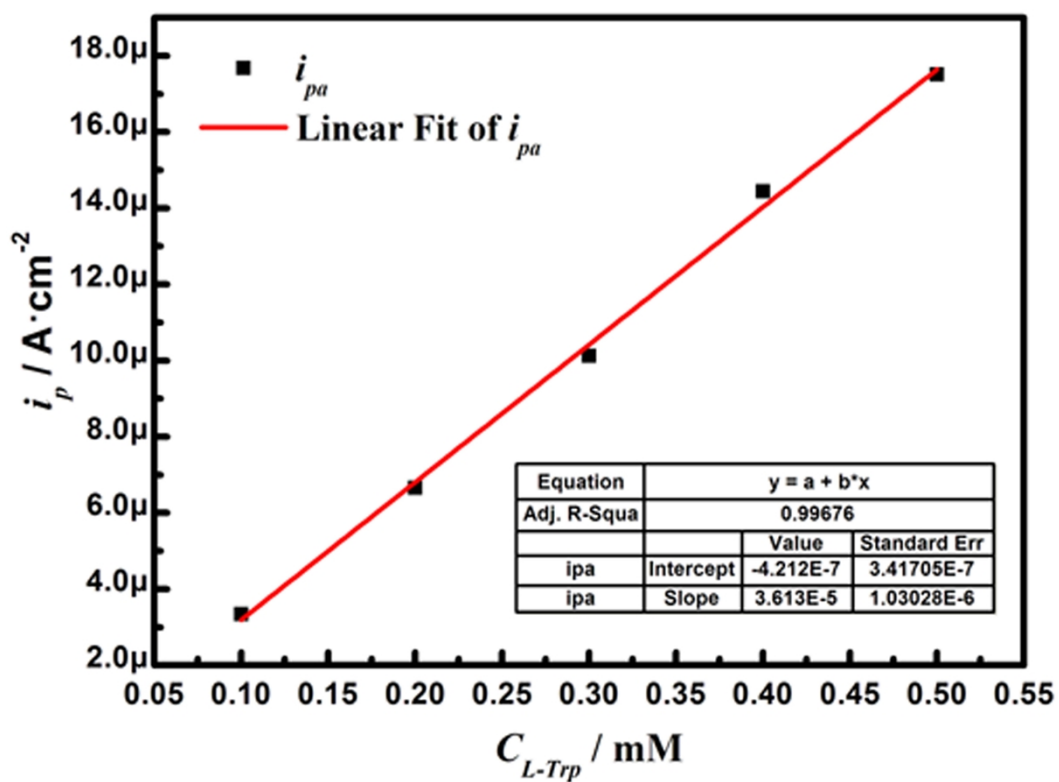

Fig. S9. Plots of  $i_{pa}$  vs. L-Trp concentration for Fig. S7.
